1 Plastic loss of motile cilia in the internal gills of *Polypterus* in  
2 response to high CO<sub>2</sub> or terrestrial environments

3

4 Running title: Plasticity of gill cilia of *Polypterus*

5 **Yuki Kimura<sup>1</sup>, Nobuaki Nakamuta<sup>2</sup> and Masato Nikaido\*,<sup>1</sup>**

6 <sup>1</sup>School of Life Science and Technology, Tokyo Institute of Technology

7 <sup>2</sup>Faculty of Agriculture, Iwate University

8 \* Corresponding author: E-mail: [mnikaido@bio.titech.ac.jp](mailto:mnikaido@bio.titech.ac.jp)

9

10 **Keywords**

11 amphibious fish, cilia, gill, plasticity, *Polypterus*, terrestrial adaptation

12

13 **Abstract**

14           The evolutionary transition of vertebrates from water to land during the Devonian  
15 period was accompanied by major changes in animal respiratory systems in terms of  
16 physiology and morphology. Indeed, the fossil record of the early tetrapods has revealed the  
17 existence of internal gills, which are vestigial fish-like traits used underwater. However, the  
18 fossil record provides only limited data to elucidate the process of the evolutionary transition  
19 of internal gills from fish to early tetrapods. This study investigated the internal gills of  
20 *Polypterus senegalus*, a basal ray-finned/amphibious fish which shows many ancestral  
21 features of stem Osteichthyes. Based on scanning electron microscopy observations and  
22 transcriptome analysis, the existence of motile cilia in the internal gills was revealed which  
23 may create a flow on the internal gill surface leading to efficient respiration. Interestingly,  
24 these cilia were observed to disappear after rearing in terrestrial or high CO<sub>2</sub> environments,  
25 which mimics the environmental changes in the Devonian period. The cilia re-appeared after  
26 being returned to the original aquatic environment. The ability of plastic loss of internal gills  
27 in *Polypterus* revealed in this study may allow them to survive in fluctuating environments,  
28 such as shallow swamps. The ancestor of Osteichthyes is also expected to have possessed  
29 such plasticity in the internal gills, which may be one of the driving forces behind the  
30 transition of vertebrates from water to land.

31

## 32 **Introduction**

33 Fish use their internal gills for respiration, but these internal gills progressively  
34 degenerated during the evolutionary transition of vertebrates from water to land, and show a  
35 corresponding physiological and morphological remodeling of the respiratory system. For  
36 example, extant Amniota (mammals, reptiles, and birds) have completely lost their internal  
37 gills and depend on lungs for respiration. In some amphibians, the internal gills which are  
38 present during the larval stage degenerate during metamorphosis into adulthood. In tracing  
39 back to earlier stages of evolution, the fossil record of *Acanthostega*, and similar Palaeozoic  
40 adult tetrapods, have shown the existence of internal gills (Coates and Clack, 1991; Schoch  
41 and Witzmann, 2011), which resembled those of lungfish (Clack, 2012). This suggests that  
42 the internal gills were still functioning in the respiratory systems of these early tetrapods  
43 which inhabited the interface between water and land. Generally, internal gills are believed to  
44 function only in water because internal gill lamellae collapse due to gravity and dry out in a  
45 terrestrial environment (Sayer, 2005). Therefore, how internal gills evolved in response to  
46 environmental changes during this transition is an issue of interest. Indeed, a few extant  
47 species of teleost fish have adapted to terrestrial environments by modifying the structure of  
48 their internal gills (e.g., mudskippers (Low et al., 1988), and mangrove killifish (*Kryptolebias*  
49 *marmoratus*) (Ong et al., 2007)). In particular, plastic structural changes were observed in the  
50 internal gill lamella of mangrove killifish during acclimation to terrestrial conditions (Ong et  
51 al., 2007; Turko et al., 2012). However, since teleost fish are once fully adapted to aquatic  
52 environments, the acclimation observed in these fish are unlikely to replicate the actual  
53 evolutionary transition that occurred in stem Osteichthyes during the Devonian period.

54 To better understand the evolution of the respiratory system of stem Osteichthyes, the  
55 group *Polypterus* (bichir, reedfish) is considered an appropriate model organism. The  
56 *Polypterus* is the most basal group of ray-finned fish (Fig. 1), and retains several ancestral  
57 traits of stem Osteichthyes. Importantly, some of these traits include the use of lungs or  
58 spiracles for air-breathing, and thus, are adapted to survival in a terrestrial environment  
59 (Graham et al., 2014; Tatsumi et al., 2016). Indeed, Standen *et al.* have successfully kept  
60 *Polypterus* on land for up to eight months (Standen et al., 2014). Turko *et al.* found that in  
61 *Polypterus* reared on land, cells filled the area between the lamellae of the internal gills and  
62 reduced the size of the internal gill skeleton (Turko et al., 2019). Therefore, inspection of the  
63 internal gills of *Polypterus* before and after rearing in a terrestrial environment, thus

64 mimicking the water to land transition, may help understand the remodeling process of the  
65 respiratory system which occurred during early tetrapod evolution.

66 In addition to the water to land transition, concentrations of oxygen and carbon  
67 dioxide in water also affect internal gill morphology (Shartau and Brauner, 2014; Turko et al.,  
68 2012; Wright and Turko, 2016). Fish excrete carbon dioxide into water through their internal  
69 gills because of the high solubility of carbon dioxide in water (Rahn, 1966); a process which  
70 does not work in terrestrial (i.e., atmospheric) or high CO<sub>2</sub> environments. In fact, *Polypterus*  
71 was shown to depress internal gill respiration in response to high CO<sub>2</sub> concentrations in an  
72 aquatic environment (Babiker, 1984). Additionally, Ultsch proposed that hypercarbic  
73 environments played a role in the water to land transition during vertebrate evolution (Ultsch,  
74 1987; Ultsch, 1996). However, until now, morphological changes to internal gills have not  
75 yet been documented after exposure to such environments over specific periods of time.

76 In this study, the alteration of the internal gills in terms of gene expression as well as  
77 morphology after the exposure to high CO<sub>2</sub> or terrestrial environments was investigated. In  
78 both experimental conditions, similar morphological changes were observed, in which the  
79 motile cilia of the internal gills of *Polypterus* disappeared, but then plastically re-appeared  
80 after the animal was returned to its original normal environmental conditions. The ability of  
81 such plastic changes in *Polypterus* provides crucial insights into their adaptation to a  
82 fluctuating environment, and possibly into the water to land transition of early tetrapods.

## 83 **Materials and methods**

### 84 **Animals and rearing environment**

85           The *Polypterus senegalus* Cuvier, 1829, used in this study were obtained from a  
86 commercial supplier (Nettaigyo-tsuhan forest, Japan) and kept in normal water conditions for  
87 at least one month before being transferred to either terrestrial conditions or high CO<sub>2</sub>  
88 conditions. Larva of *Polypterus* was obtained from the Kamihata Fish Industry Group in  
89 Japan. The larval stage was estimated to be Stage 36 or later according to a previous study  
90 (Bartsch et al., 1997). Axolotl (*Ambystoma mexicanum* Shaw and Nodder, 1798) were  
91 obtained through a local pet shop (Suikei-Kobo, Japan). The experiments were conducted in  
92 accordance with the Tokyo Institute of Technology Regulations for the Management of  
93 Animal Experiments.

94           The control fish were kept in a 600 L tank with a filtration system. The water  
95 temperature was approximately 28°C ± 1°C. The light/dark cycle changed every 12 hours.  
96 Fish in a terrestrial environment were kept in a 25 cm × 35 cm mesh cage at a depth of about  
97 1 mm with a supply of filtered water and foggers as in previous studies (Standen et al., 2014;  
98 Turko et al., 2019). In the high CO<sub>2</sub> experiment, ambient temperature CO<sub>2</sub> gas was added  
99 continuously until the internal gill ventilation of *Polypterus* was depressed, in accordance  
100 with previous research (Babiker, 1984). The 35 cm × 35 cm × 20 cm tank was continuously  
101 stirred using a water filter (Rio+ filter-set 2, Kamihata, Japan) to equalize and ensure a  
102 uniform carbon dioxide concentration. Fish were kept in the environments described above  
103 for at least one month.

104

### 105 **Observation by scanning electron microscopy (SEM)**

106           After keeping the animals in the respective environments, they were euthanized by  
107 decapitation and dissected. Specimens of internal and external gills for electron microscopy  
108 were washed in 0.7x PBS, then fixed in 2.5% glutaraldehyde, and treated with 8N HCl at  
109 60°C for 30 minutes to remove surface mucus. The specimens were then dehydrated by  
110 ethanol series, and dried in a freeze dryer (ES-2030, Hitachi, Japan) using t-butyl alcohol.  
111 The specimens were osmium coated and observed by SEM (JSM-7001F, JEOL, Japan).

112

### 113 Immunofluorescence staining

114 Indirect immunofluorescence was performed using the following antibodies: anti-  
115 alpha tubulin (acetyl K40, rabbit monoclonal, abcam, ab179484, 1:2000), and anti-calretinin  
116 (mouse monoclonal, swant, 6B3, 1:2000) were used as primary antibodies. Anti-rabbit IgG  
117 (H+L) Alexa Fluor 594 (donkey polyclonal, Invitrogen, AB\_141637, 1:2000), and anti-  
118 mouse IgG (gamma 1) Alexa Fluor 488 (goat polyclonal, Invitrogen, AB\_2535764, 1:2000)  
119 were used as secondary antibodies. The entire internal and external gills were immunostained  
120 as follows: incubated with 0.5 % Triton x-100 (v/v) in 0.7x PBS for 15 minutes at room  
121 temperature, washed with 0.7x PBS, and then blocked with normal goat serum 10% and  
122 bovine serum albumin 1% in 0.7x PBS for 1 hour. After washing with PBS, primary  
123 antibodies of anti-tubulin were added and incubated at room temperature for 1 hour.  
124 Secondary antibodies were reacted following the same procedure. The same procedure was  
125 also used to stain for calretinin. To prevent fading of the fluorescence, a mounting medium  
126 (VECTASHIELD with DAPI, Vector Laboratories, US) was added. The images were taken  
127 with a fluorescence microscope (Axioplan2, Carl ZEISS, Germany). After taking the photos,  
128 Photoshop was used to correct the levels and modify the colors.

129

### 130 Histological observation with HE stain

131 Internal gills specimens were fixed in Bouin's fixative. The specimens were then  
132 dehydrated in ethanol, replaced by xylene, and embedded in paraffin. Thin sagittal sections  
133 with a thickness of 5  $\mu$ m were prepared. The sections were stained with haematoxylin and  
134 eosin.

135

### 136 RNA-seq analysis

137 RNA was extracted from three individuals reared in the control water environment  
138 and from three individuals reared in the terrestrial environment using TRI Reagent  
139 (Molecular Research Center, Inc.). The extracted total RNAs were sequenced at 100 bp

140 paired-end on a NovaSeq 6000 from Macrogen Japan Corp, with the TruSeq stranded mRNA  
141 Library Prep Kit. The quality control of raw sequence data was performed with fastp (Chen et  
142 al., 2018) with the following options: -g, -q 20, -w 16. Next, the read data were mapped to the  
143 reference genome (Bchr\_013 (Bi et al., 2021)) with STAR version 2.7.3a (Dobin et al., 2013).  
144 The mapped reads were then counted with featureCounts (Liao et al., 2014). Differentially  
145 expressed genes (DEGs) were estimated by TCC (Sun et al., 2013) with the iDEGES/*edgeR*-  
146 *edgeR* combination. The Over Representation Analysis (ORA) was conducted with  
147 WebGestalt (<http://www.webgestalt.org>) (Liao et al., 2019).

148

149 **Results**

150 The cilia on the surface of gills

151 SEM observations and immunostaining with an acetylated tubulin antibody revealed  
152 the existence of cilia as bundle-like structures distributed on the surface of primary internal  
153 gill lamella of *Polypterus senegalus* (gray bichir) (Fig. 2A–C, Fig. S1A and Fig. 3A). These  
154 cilia were also observed on the external gills of axolotl by SEM observation (Fig. S1B). In  
155 *Polypterus*, the cilia were relatively short and distributed in a spotted pattern, whereas in  
156 axolotl, they were long and distributed in a band-like pattern. In addition to the internal gills,  
157 the existence of the cilia in the external gills of larval *Polypterus* was confirmed by  
158 immunostaining with an acetylated tubulin antibody (Fig. S1C).

159 Next, individual *Polypterus* were reared in either terrestrial environments or in high CO<sub>2</sub>  
160 water for more than one month. It is noteworthy that internal gill ventilation was observed  
161 when the water level was high enough to immerse the head, but was suppressed when the  
162 water level was too low to immerse the head (Fig. S2). The suppression of internal gill  
163 movement was also observed in the high CO<sub>2</sub> environment, as was also observed by Babiker  
164 (1984). The internal gills of *Polypterus* reared in terrestrial and in high CO<sub>2</sub> water  
165 environments were then investigated to identify the presence or absence of cilia. Interestingly,  
166 SEM and immunostaining observation revealed that the cilia disappeared in the internal gills  
167 of *Polypterus* reared in both of these environmental conditions (Fig. 2D–F, Fig. 3B).

168 In the next trial, we returned the *Polypterus* individuals exposed to terrestrial or high  
169 CO<sub>2</sub> environments for one month back to the original water environment and reared them for  
170 an additional month. The SEM and immunostaining observations for the resultant *Polypterus*  
171 individuals revealed that the cilia in the internal gills had recovered with no apparent  
172 differences relative to those reared only in control water (Fig. 3B). These results suggest that  
173 the *Polypterus* possesses the ability to undergo plastic morphological changes (formation and  
174 de-formation) of cilia in the internal gills in response to environmental changes they  
175 experience.

176 In addition to internal gill cilia, the enlargement of the interlamellar cell mass (ILCM)  
177 between the lamellae of the internal gills was examined in the *Polypterus*, which were reared  
178 in both the terrestrial and high CO<sub>2</sub> environments. A previous study revealed that



179 enlargement occurs in the ILCM of *Polypterus* reared on land (Turko et al., 2019), which was  
180 confirmed in the present study (Fig. 4), and a similar enlargement of the ILCM was also  
181 found to have occurred in the individuals reared in the high CO<sub>2</sub> environment (Fig. 4).

182

### 183 Elucidation of cilia function by RNA-seq analysis

184 The DEGs analyses were conducted on the whole exome sequencing data (RNA-seq  
185 data) for the internal gills of the *Polypterus* reared in both water and terrestrial environments.  
186 In particular, this study aimed to elucidate the function of cilia in the internal gills, which had  
187 not yet been documented. Considering that cilia were lost in the terrestrial environments, a  
188 focus was made on the DEGs of which the expressions were reduced in internal gills under  
189 terrestrial conditions. As a result, a total of 868 DEGs were obtained which was statistically  
190 significant. An ORA was then performed for the list of down-regulated DEGs ( $p < .05$ ) using  
191 WebGestalt (Liao et al., 2019). The results of the ORA indicated that the down-regulated  
192 gene groups were related to 1. axonemal dynein complex assembly, 2. axoneme assembly, 3.  
193 cilium movement, and 4. cilium assembly (Fig. 5A). The further inspection of these gene  
194 groups revealed that they were represented by *foxj1a*, which is included in one of the major  
195 genes involved in cilium movement (Fig. 5B). *foxj1a* is a homolog of *foxj1* (Forkhead box  
196 protein J1)(Aamar and Dawid, 2008; Hellman et al., 2010). The protein encoded by *foxj1* is a  
197 master regulator of the motile ciliogenic program (Yu et al., 2008). The degree of expression  
198 of several genes regulated by *foxj1* was examined (Mukherjee et al., 2019), and found that  
199 they were also significantly down-regulated (Fig. 5B). These results indicate that *foxj1*, and  
200 its downstream genes involved in cilia movement, were down-regulated in terrestrial  
201 environments. These lines of data suggest that the cilia distributed on the internal gills of  
202 *Polypterus* are motile.

203 Whether these cilia have specific functions beyond motility was also examined. It has  
204 been shown that taste buds of lampreys possess cilia, while those of bony fishes and  
205 mammals possess microvilli (Baatrup, 1983; Barreiro-Iglesias et al., 2008). However, until  
206 now, there have been no reports describing the taste buds of *Polypterus* in terms of the  
207 existence of cilia or microvilli. Therefore, an examination was conducted to determine  
208 whether the ciliated cells on the internal gills of *Polypterus* were taste buds or not.

209 Immunostaining was performed using an anti-calretinin antibody which is used as a  
210 chemosensory marker in vertebrates, including for taste buds (Barreiro-Iglesias et al., 2008).  
211 As a result, clear signals of calretinin-positive cells were observed which show typical taste  
212 bud like structures on the internal gill arches of *Polypterus* (Fig. 5C left). Importantly, no  
213 signal of acetylated tubulin positive cells was observed, indicating the absence of ciliated  
214 cells in the taste buds. Additionally, no calretinin-positive cells were observed where  
215 acetylated tubulin positive cells were concentrated (Fig. 5C right). These results suggest that  
216 the ciliated cells on the internal gills of *Polypterus* are not taste buds.

217 Whether these cilia possessed functions of innate immunity was also examined, since  
218 the ciliated cells found in the airway epithelium of mammals have been shown to be involved  
219 in the immune system (Freund et al., 2018; Shah et al., 2009). Indeed, several taste 1  
220 receptors (*Tas1Rs*) and taste 2 receptors (*Tas2Rs*) expressed in the upper airway respond to  
221 substances secreted by Gram-negative bacteria. These *Tas1Rs* and *Tas2Rs* are essential to  
222 trigger mucociliary clearance by controlling the beating of motile cilia (Lee et al., 2012).  
223 Therefore, the expression of the *Tas1Rs* and *Tas2Rs* gene cascade was examined. The  
224 expression level of *Tas2Rs* was quite low and difficult to detect by RNA-seq. The next focus  
225 was on *trpm5* and *plcb2*, which are located downstream of the *Tas1Rs* and *Tas2Rs* gene  
226 cascades (Ahmad and Dalziel, 2020; Tuzim and Korolczuk, 2021). Both genes were  
227 expressed in internal gills, but there were no significant changes in expression levels  
228 observed between aquatic and terrestrial environments (Fig. S3A and B). Next, the focus was  
229 on three genes of nitric oxide synthase (NOS), which also contributes toward controlling the  
230 beating of motile cilia in the airway epithelium of mammals. It is noteworthy that one of the  
231 NOS genes was lost in teleost fish after the whole genome duplication (Donald et al., 2015),  
232 however, all three NOS genes were identified in the genome of *Polypterus*. A comparison of  
233 the expression levels of the three types of NOS genes in the internal gills of *Polypterus* found  
234 no significant differences between the control and terrestrial environments (Fig. S3C). These  
235 lines of data suggest that the cilia in the internal gills of *Polypterus* do not play a specific role  
236 in *Tas1R/Tas2R*-related innate immunity shown in the mammalian airway epithelium, but  
237 provide only motile functions, which may contribute toward producing water flow for  
238 efficient respiration.

## 239 Discussion

### 240 Origin of cilia in the internal gills

241 This study revealed the existence of cilia in the internal gills of *Polypterus*. This is  
242 the first report of ciliated cells of the internal gills in a ray-finned fish (Actinopterygii).  
243 Although several SEM images of internal gills have been presented in model organisms such  
244 as zebrafish (*Danio rerio*) and medaka (*Oryzias latipes*) (Leguen, 2018; Messerli et al., 2020),  
245 the cilia were not described in these studies. Cilia were not found in internal gills and/or  
246 specialized respiratory organs in walking catfish (Clariidae) nor in mangrove killifish (*K.*  
247 *marmoratus*), which are also adapted to the terrestrial environment in a manner similar to  
248 *Polypterus* (Maina, 2018; Ong et al., 2007). Additionally, sharks (cartilaginous fishes) do not  
249 possess cilia in their internal gills (Bullard et al., 2001). On the other hand, cilia have been  
250 reported in the internal gills of a lobe-finned fish, the Australian lungfish (*Neoceratodus*  
251 *forsteri*, Sarcopterygii) (Kemp, 1996), which diverged from the common ancestor of  
252 Osteichthyes 470 million years ago (Wang et al., 2021). It is plausible that cilia in the internal  
253 gills had been acquired in the common ancestor of Osteichthyes and retained in *Polypterus*  
254 and lobe-finned fish, but were lost in most other ray-finned fish, which diverged later than  
255 *Polypterus*. However, the size and arrangement of the cilia in the internal gills of *Polypterus*  
256 are distinct from those seen in lungfish, which are morphologically more similar to those seen  
257 in the external gills of amphibians (Ichikawa and Toyozumi, 2020; Kemp, 1996). Indeed, the  
258 cilia of *Polypterus* are noticeably obviously short and are distributed in a circular dotted  
259 pattern (Fig. S1A), while those in lungfish and amphibians are long and distributed in band-  
260 like patterns (Fig. S1B). The morphological distinctness of the cilia observed in the internal  
261 gills of *Polypterus* and lungfish implies that specific roles of cilia have diversified between  
262 ray-finned and lobe-finned fish.

263

### 264 Function of the cilia

265 In this study, immunostaining data showed that the cilia found in the internal gills of  
266 *Polypterus* were not taste buds. Additionally, transcriptome analyses suggested that these  
267 cilia did not possess functions in Tas1R/Tas2R related to innate immunity as seen in the  
268 airway epithelium of mammals. On the contrary, the cilia in the external gills were believed

269 to produce water flow in amphibians and larval *Polypterus* (Bartsch et al., 1997; Ichikawa  
270 and Toyozumi, 2020). Additionally, the cilia seen in the internal gills of Australian lungfish,  
271 which exist only during the larval stages, have been shown experimentally to produce water  
272 flow (Kemp, 1996). These cilia are responsible for increasing the efficiency of respiration  
273 and eliminating small particles such as micro-organisms from internal and external gill  
274 surfaces (Bartsch et al., 1997; Ichikawa and Toyozumi, 2020; Kemp, 1996). In this study, the  
275 cilia found in the internal gills of adult *Polypterus* were shown to be motile (Fig. 5). However,  
276 it appears that the internal gills of *Polypterus* have sufficient water exchange capacity even  
277 without cilia. This may be explained by the dual respiration system used by *Polypterus*,  
278 which utilizes both lungs and internal gills. A previous study revealed that the frequency of  
279 internal gill respiration in *Polypterus* decreases significantly before and after air-breathing  
280 (Magid, 1966). Additionally, it has been proposed that internal gill ventilation is inefficient in  
281 bony fish, consuming from 10% to up to 69% of the oxygen obtained through respiration  
282 (Milsom, 1989). *Polypterus* may reduce its frequency of internal gill respiration by  
283 complementing it with pulmonary respiration. However, depression of internal gill respiration  
284 leads to the reduction of other internal gill functions such as ion transport and the excretion of  
285 carbon dioxide and ammonia (Ultsch, 1996). During such temporary depression of internal  
286 gill respiration, the motile cilia may function to increase efficient water flow for excretion  
287 and transport. Considering that internal gill cilia and pulmonary respiration are mutually  
288 reinforcing in function, it is plausible that they were acquired at the same time in their  
289 evolution.

290

## 291 The plasticity of cilia in internal gills in response to the environments

292 This study found that the cilia in the internal gills of *Polypterus* were lost after the  
293 exposure to a terrestrial environment (Fig. 2, 3), and it noteworthy that the cilia in the  
294 external gills of amphibians disappear first during metamorphosis (Hackford et al., 1977),  
295 which resembles the loss of cilia seen in *Polypterus* in a terrestrial environment. Considering  
296 that the cilia play essential roles in efficient respiration, excretion of the carbon dioxide, *etc.*,  
297 it makes sense that cilia disappear under conditions where water is unavailable. Previous  
298 studies have revealed a reduction in the volume of mineralized bone in the internal gills after  
299 8 months of rearing on land, suggesting that *Polypterus* may reduce investment in its internal

300 gills when in a terrestrial environment (Turko et al., 2019). Importantly, the loss and  
301 regeneration of the cilia are plastic in response to the environmental change (Fig. 3),  
302 suggesting that the loss of cilia shown in this study does not result from an injury due to the  
303 forced terrestrialization. This plasticity may have been acquired as a result of an adaptation to  
304 fluctuating environments, such as encountered in shallow rivers and swamps, which  
305 *Polypterus*, and possibly the ancestors of Osteichthyes, inhabited.

306         Similar to terrestrialization, the high concentration of CO<sub>2</sub> in water resulted in the  
307 plastic loss and regeneration of cilia in the internal gills of *Polypterus* (Fig. 3). Previous  
308 studies have revealed that internal gill ventilation in *Polypterus* was depressed in water with  
309 high CO<sub>2</sub> concentrations (Babiker, 1984), and this finding was confirmed in this study. In a  
310 high CO<sub>2</sub> environment, internal gill respiration causes several negative impacts, represented  
311 by acidosis. It is presumed that *Polypterus* survives in a high CO<sub>2</sub> environment by depressing  
312 internal gill ventilation and switching to respiration through the lungs when needed. Since  
313 respiration through internal gills are not adaptive in a high CO<sub>2</sub> environment, the frequency  
314 of internal gill ventilation as well as the motile cilia, would likely be reduced.

315

#### 316 ILCM size changes in response to environmental changes

317         In addition to these microstructural changes involving cilia, the enlargement of the  
318 ILCM was observed in response to high CO<sub>2</sub> concentrations or when the animal was in  
319 terrestrial environments (Fig. 4). A previous study showed that the ILCM between the  
320 secondary gill lamellae were enlarged in the internal gills of *Polypterus* reared on land (Turko  
321 et al., 2019). The enlargement or reduction of ILCM are also widely observed in teleost fish  
322 such as crucian carp (*Carassius carassius*) and mangrove killifish (Nilsson et al., 2012; Ong  
323 et al., 2007; Sollid et al., 2003). In crucian carp, the area of the ILCM reduces in response to  
324 low oxygen, leading to the increase in the surface area of the internal gills, and thus, the  
325 increase of oxygen absorption capacity (Nilsson et al., 2012). The enlargement of the ILCM  
326 of *Polypterus* in high CO<sub>2</sub> conditions suggests a reduction of surface area of the internal gills,  
327 further resulting in the reduction of the passive import of CO<sub>2</sub> from the water. It is  
328 noteworthy that both the high CO<sub>2</sub> condition and terrestrial environment induced the same

329 morphological changes in the internal gills of *Polypterus*, which has the ability to breathe air  
330 (see latter discussion).

331

### 332 High CO<sub>2</sub> environments and the water to land transition

333 Previously, the possible link between hypercarbia and the water to land transition has  
334 been discussed. Because of its high solubility in water, CO<sub>2</sub> is normally excreted through the  
335 internal gills of most fish. In contrast, air-breathing fish take in O<sub>2</sub>-rich air, resulting in a  
336 lower frequency of ventilation using internal gills. Therefore, the blood of air-breathing fish  
337 shows a higher  $P_{CO_2}$  relative to other fish (Bayley et al., 2019; Ultsch, 1996). Indeed, in some  
338 obligate air-breathing fish, the acid-base status of the blood is similar to that seen in amniotes  
339 (Bayley et al., 2019; Ultsch, 1996). Based on studies showing that hypoxic environments are  
340 also high in carbon dioxide, it has been proposed that air-breathing fish may have shifted to  
341 high  $P_{CO_2}$ , [HCO<sub>3</sub><sup>-</sup>] blood prior to their terrestrial adaptation during vertebrate evolution  
342 (Ultsch, 1996).

343 In this study, both high CO<sub>2</sub> water and terrestrial environments were found to lead to  
344 the similar results in *Polypterus*, namely, the depression of internal gill respiration, ILCM  
345 enlargement, and the loss of cilia in the internal gills. Based on these finding, we propose the  
346 following scenario in which the adaptive character(s) for high CO<sub>2</sub> environments in air-  
347 breathing fish were later co-opted for terrestrial adaptation: (1) Air-breathing using lungs  
348 evolved in the common ancestor of Osteichthyes, allowing them to survive in low O<sub>2</sub> and  
349 high CO<sub>2</sub> environments. Additional to air-breathing, cilia were acquired to facilitate water  
350 flow for efficient respiration and material exchange in the internal gills. (2) In response to  
351 further elevation of CO<sub>2</sub> concentration in the water, air-breathing fish depressed internal gill  
352 ventilation, reduced surface area, and lost cilia. (3) The early tetrapods were thus ready to  
353 adapt to a terrestrial lifestyle because some adaptive characters acquired in high CO<sub>2</sub>  
354 environments were also adaptive in terrestrial environments. For example, the depression of  
355 internal gill ventilation and the enlargement of the ILCM were adaptive to a terrestrial  
356 environment as they both prevented desiccation. The loss of cilia was also adaptive in that  
357 respiration and material transfer through internal gills are not functional on land. Importantly,  
358 the above changes of the internal gills were plastic in the ancestor of Osteichthyes, and that

359 may have allowed them to progressively accomplish the incremental transition from water to  
360 land.

361 In this study, SEM observations and transcriptome analyses revealed the existence of  
362 motile cilia in the internal gills of *P. senegalus*, which may create a flow of water on the  
363 internal gill surface leading to efficient respiration and material transport. These motile cilia  
364 were observed to have been plastically lost and regenerated in response to environmental  
365 changes resulting from rearing in terrestrial and high CO<sub>2</sub> environments. In some Devonian  
366 fish, some characters evolved under similar high CO<sub>2</sub> environments may have been later co-  
367 opted during the adaptation to terrestrial environments by early tetrapods. The specific  
368 features characterized in the present study of *Polypterus*, the oldest lineage of amphibious  
369 ray-finned fish, provide important insights into the evolutionary transition of vertebrates from  
370 water to land.

371

## 372 **Acknowledgements**

373 We thank Yujiro Kawabe of the Tokyo Institute of Technology for the fish illustration  
374 included in Fig. 1. We also thank Shizuka Oki, Yasuyo Shigetani, and Masataka Okabe of the  
375 Jikei University School of Medicine for teaching HE staining.

## 376 **Data availability**

377 All sequence reads were deposited in the DDBJ Sequence Read Archive under BioProject  
378 accession no. PRJDB13172.

## 379 **Funding**

380 This work was supported by Grant-in-Aid for JSPS Fellows Grant Number 21J21544 and the  
381 Asahi Glass Foundation to M.N.

## 382 **Competing interests**

383 We declare we have no competing interests.

384 **Authors' contributions**

385 Y.K.: Conceptualization, formal analysis, investigation, writing - original draft, visualization,  
386 funding acquisition; N.N.: Investigation, writing - review & editing; M.N.: Writing - review  
387 & editing, supervision, funding acquisition

388



389 **Figures**

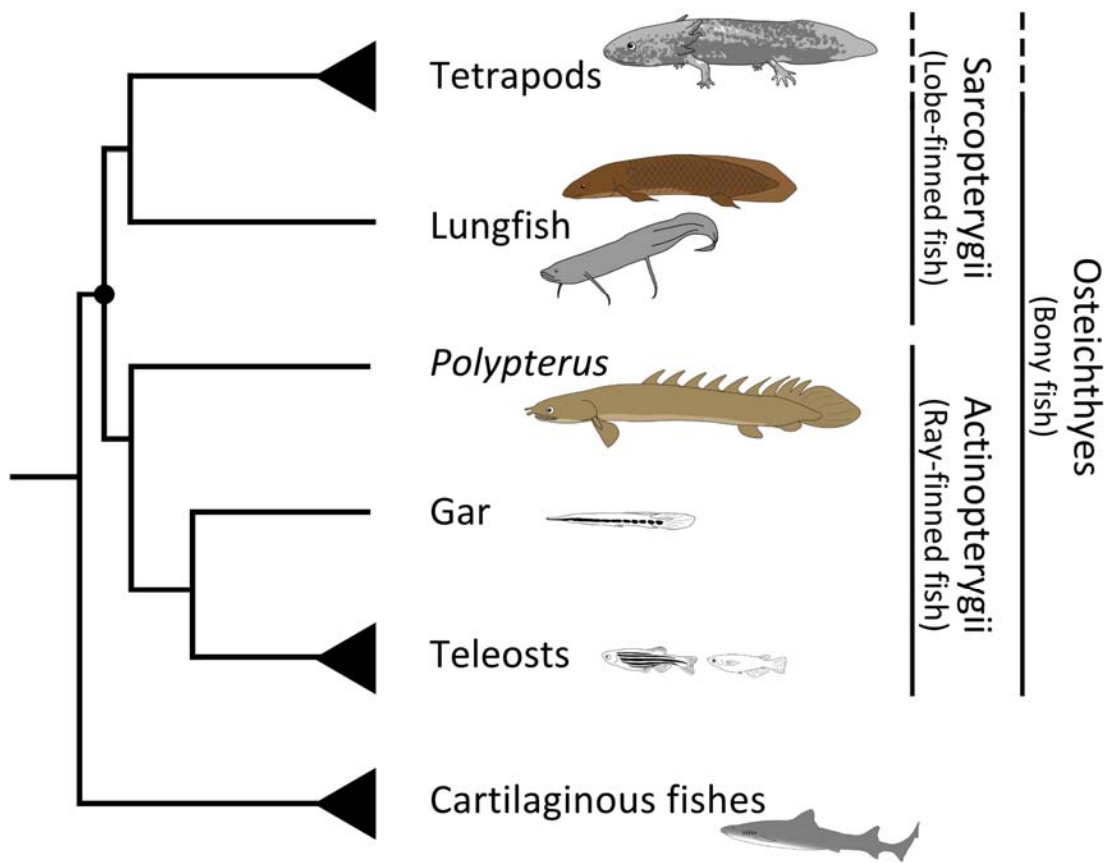

390

391 **Figure 1. Phylogenetic relationships among cartilaginous fishes, tetrapods, lungfish and**  
392 ***Polypterus*.** The black circle on the tree indicates the common ancestor of Osteichthyes.

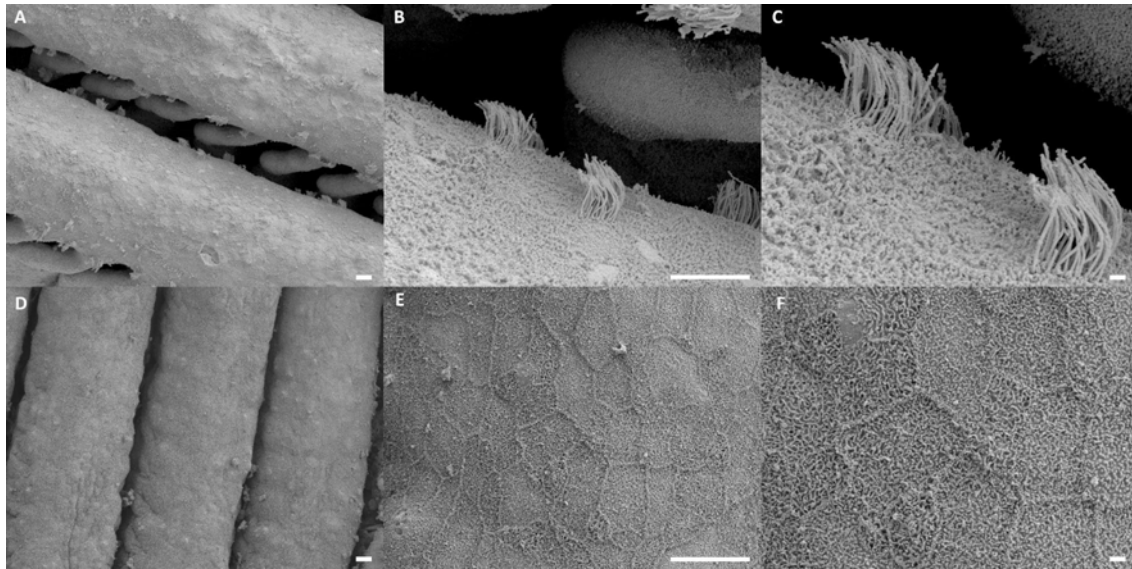

393

394 **Figure 2. Scanning electron micrograph of the surface of internal gill filaments of**  
395 ***Polypterus senegalus*.** The surface of *Polypterus* reared in water (A–C) and terrestrial  
396 environment (D–F). Scale bar in A, B, D and E = 10  $\mu\text{m}$ , in C and F = 1  $\mu\text{m}$ .

397

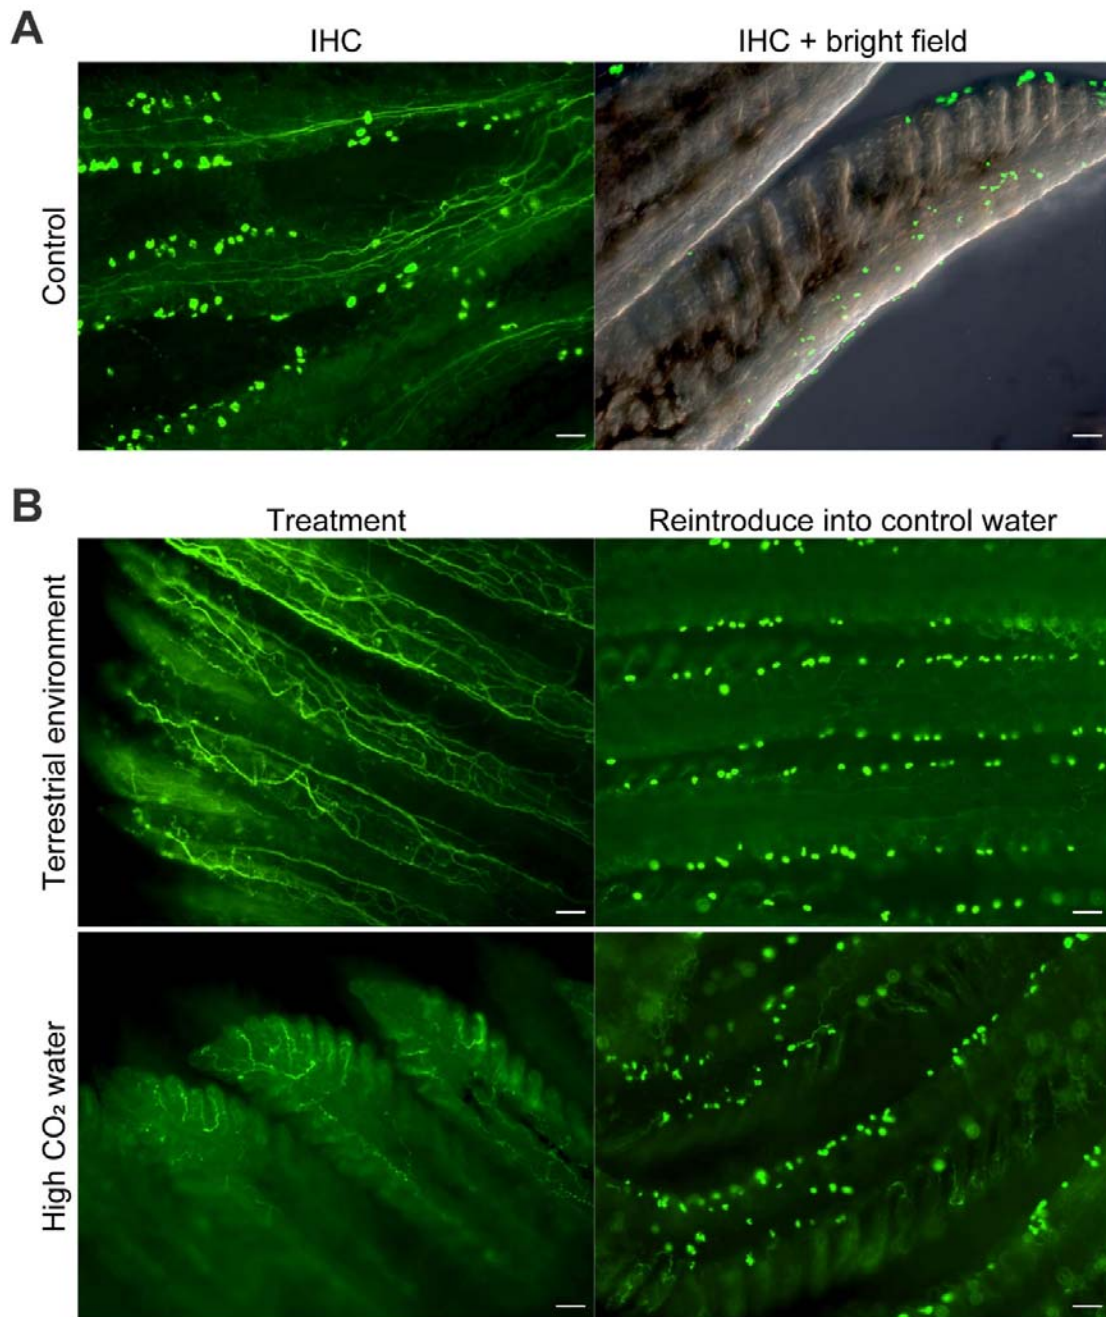

398

399 **Figure 3. Acetyl alpha Tubulin immunostaining of internal gills of *P. senegalus*.** The  
400 internal gills of *Polypterus* reared in control water (A), in a terrestrial environment (B: top  
401 part), and in high CO<sub>2</sub> water (B: bottom part). Punctate spots indicate the presence of  
402 multiple cilia. Scale bar = 50 μm.

403

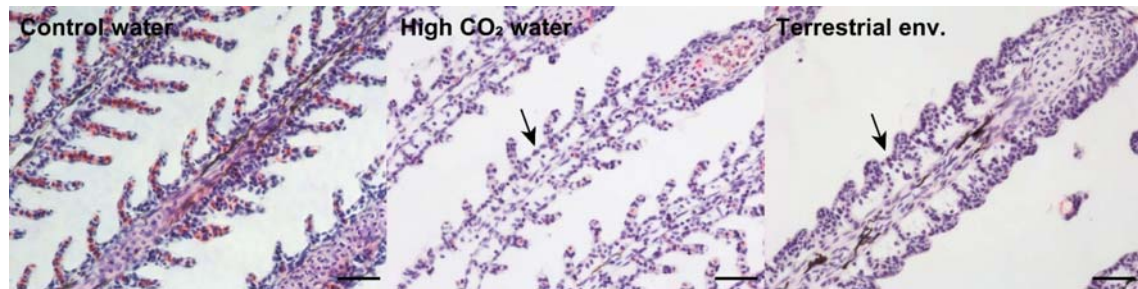

404

405 **Figure 4. Light micrographs of internal gills of *P. senegalus* stained with hematoxylin**  
406 **and eosin.** The inter-lamellar cell mass (ILCM) was enlarged in high CO<sub>2</sub> water condition  
407 and terrestrial environment compared to the control water (arrows). Scale bar = 50 μm.

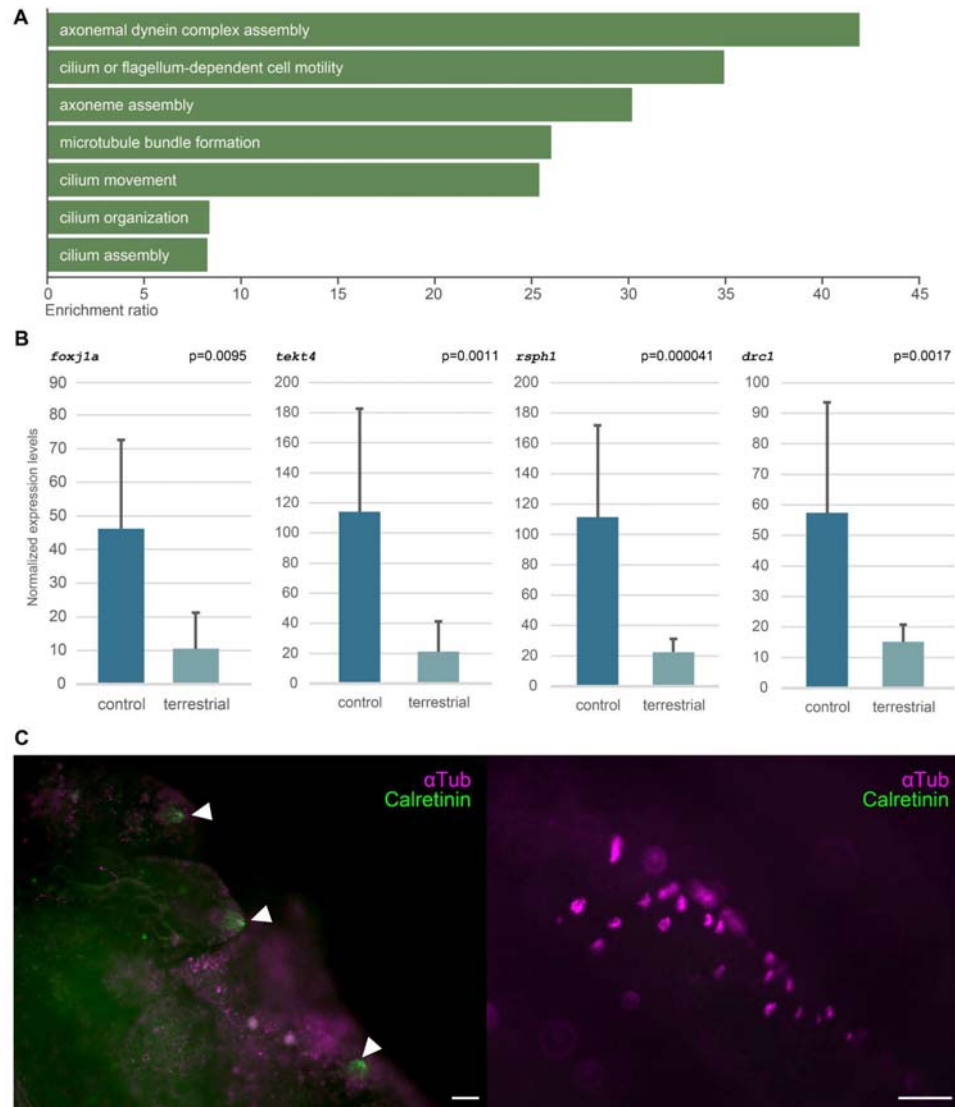

408

409 **Figure 5. Results of expression analysis and calretinin immunostaining in gills.** (A) The  
410 results of over representation analysis using genes whose expression levels were reduced in  
411 the internal gills of *Polypterus* reared in a terrestrial environment. (B) Normalized expression  
412 levels of four representatives of genes known to be involved in cilia movement. TCC was  
413 used for normalization (see methods section). (C) Micrograph of internal gills immunostained  
414 with anti-calretinin antibody (light green) and anti-acetylated alpha tubulin antibody  
415 (magenta). The left image shows the presence of taste buds (arrowhead) and absence of  
416 ciliated cells in the internal gill arches. The right image shows the presence of ciliated cells  
417 and absence of taste buds in the internal gill lamella. Scale bar = 50  $\mu$ m.

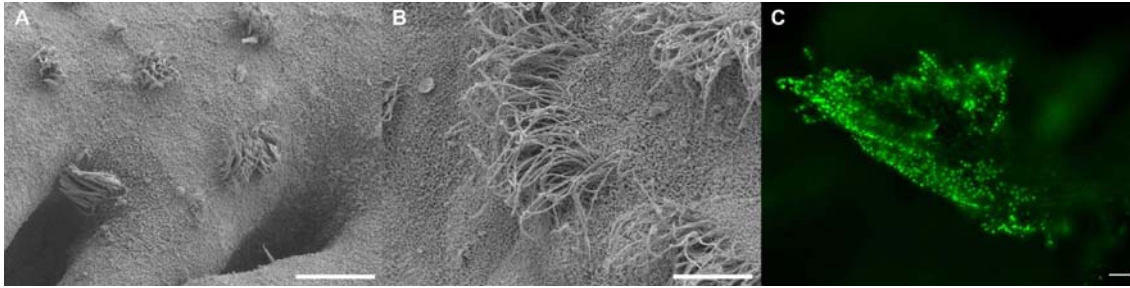

418

419 **Figure S1. SEM and immunostaining images of internal and external gills of *Polypterus***  
420 **and axolotl.** (A) Scanning electron micrograph (SEM) of the surface of internal gill filaments  
421 of adult *P. senegalus* reared in water. (B) SEM of the surface of external gill filaments of *A.*  
422 *mexicanum*. (C) Micrograph of external gills of larva of *P. senegalus* immunostained with  
423 anti-acetylated alpha tubulin antibody. Scale bar in A and B = 10  $\mu\text{m}$ , in C = 100  $\mu\text{m}$ .

424

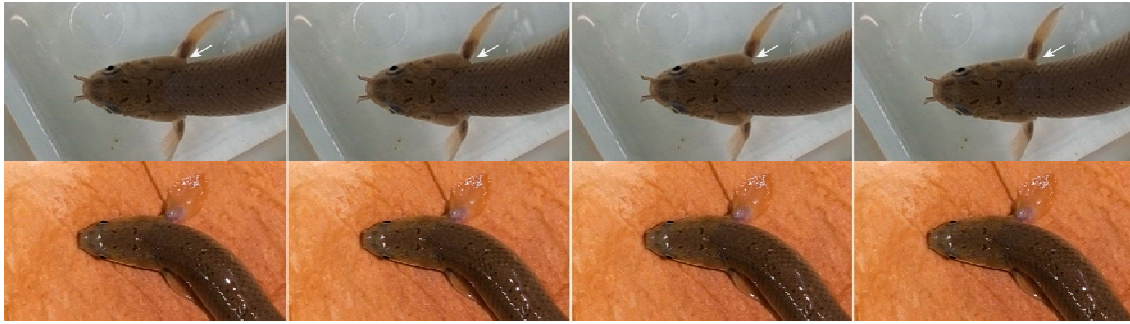

425

426 **Figure S2. Respiration of *Polypterus* in water and terrestrial environments.** The internal  
427 gill respiration of *Polypterus* in water (top part) and terrestrial environments (bottom part).  
428 The top and bottom still images are cropped at the same frame interval. The arrows indicate  
429 where the internal gills are moving during respiration in water.

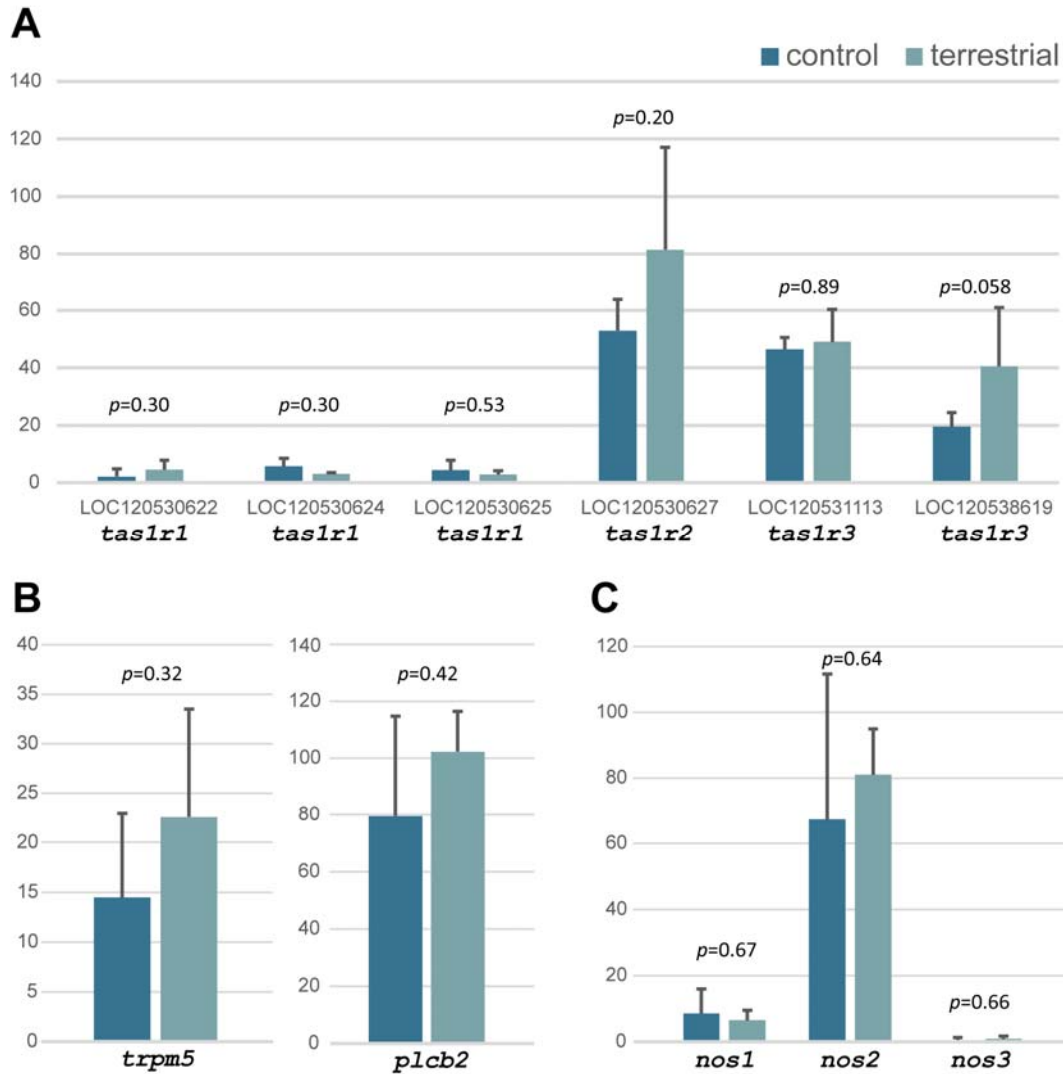

430

431 **Figure S3. Expression levels of some genes in gills in aquatic and terrestrial**  
432 **environments.** Normalized expression levels of (A) Tas1Rs and genes known to be involved  
433 in (B) Tas2R cascade (C) NOS (Nitric Oxide Synthase). TCC was used for normalization and  
434 testing (see methods section).



435 **References**

- 436 **Aamar, E. and Dawid, I. B.** (2008). Isolation and expression analysis of *foxj1* and *foxj1.2* in  
437 zebrafish embryos. *Int. J. Dev. Biol.* **52**, 985–991.
- 438 **Ahmad, R. and Dalziel, J. E.** (2020). G Protein-Coupled Receptors in Taste Physiology and  
439 Pharmacology. *Front. Pharmacol.* **11**, 587664.
- 440 **Baatrup, E.** (1983). Terminal buds in the branchial tube of the brook lamprey (*Lampetra planeri*  
441 (Bloch))-putative respiratory monitors. *Acta Zool.* **64**, 139–147.
- 442 **Babiker, M. M.** (1984). Development of dependence on aerial respiration in *Polypterus senegalus*  
443 (Cuvier). *Hydrobiologia* **110**, 351–363.
- 444 **Barreiro-Iglesias, A., Villar-Cerviño, V., Villar-Cheda, B., Anadón, R. and Rodicio, M. C.**  
445 (2008). Neurochemical characterization of sea lamprey taste buds and afferent gustatory fibers:  
446 presence of serotonin, calretinin, and CGRP immunoreactivity in taste bud bi-ciliated cells of the  
447 earliest vertebrates. *J. Comp. Neurol.* **511**, 438–453.
- 448 **Bartsch, P., Gemballa, S. and Piotrowski, T.** (1997). The embryonic and larval development of  
449 *Polypterus senegalus* Cuvier, 1829: Its staging with reference to external and skeletal features,  
450 behaviour and locomotory habits. *Acta Zool.* **78**, 309–328.
- 451 **Bayley, M., Damsgaard, C., Thomsen, M., Malte, H. and Wang, T.** (2019). Learning to Air-  
452 Breathe: The First Steps. *Physiology* **34**, 14–29.
- 453 **Bi, X., Wang, K., Yang, L., Pan, H., Jiang, H., Wei, Q., Fang, M., Yu, H., Zhu, C., Cai, Y., et al.**  
454 (2021). Tracing the genetic footprints of vertebrate landing in non-teleost ray-finned fishes. *Cell*  
455 **184**, 1377–1391.e14.
- 456 **Bullard, S. A., Frasca, S., Jr and Benz, G. W.** (2001). Gill lesions associated with *Eryocotyle*  
457 *tiburonis* (Monogenea: Hexabothriidae) on wild and aquarium-held bonnethead sharks (*Sphyrna*  
458 *tiburo*). *J. Parasitol.* **87**, 972–977.
- 459 **Chen, S., Zhou, Y., Chen, Y. and Gu, J.** (2018). fastp: an ultra-fast all-in-one FASTQ preprocessor.  
460 *Bioinformatics* **34**, i884–i890.
- 461 **Clack, J. A.** (2012). *Gaining Ground, Second Edition: The Origin and Evolution of Tetrapods.*  
462 Indiana University Press.
- 463 **Coates, M. I. and Clack, J. A.** (1991). Fish-like gills and breathing in the earliest known tetrapod.

- 464 *Nature* **352**, 234–236.
- 465 **Dobin, A., Davis, C. A., Schlesinger, F., Drenkow, J., Zaleski, C., Jha, S., Batut, P., Chaisson, M.,**  
466 **and Gingeras, T. R.** (2013). STAR: ultrafast universal RNA-seq aligner. *Bioinformatics* **29**, 15–  
467 21.
- 468 **Donald, J. A., Forgan, L. G. and Cameron, M. S.** (2015). The evolution of nitric oxide signalling in  
469 vertebrate blood vessels. *J. Comp. Physiol. B* **185**, 153–171.
- 470 **Freund, J. R., Mansfield, C. J., Doghramji, L. J., Adappa, N. D., Palmer, J. N., Kennedy, D. W.,**  
471 **Reed, D. R., Jiang, P. and Lee, R. J.** (2018). Activation of airway epithelial bitter taste  
472 receptors by *Pseudomonas aeruginosa* quinolones modulates calcium, cyclic-AMP, and nitric  
473 oxide signaling. *J. Biol. Chem.* **293**, 9824–9840.
- 474 **Graham, J. B., Wegner, N. C., Miller, L. A., Jew, C. J., Lai, N. C., Berquist, R. M., Frank, L. R.**  
475 **and Long, J. A.** (2014). Spiracular air breathing in polypterid fishes and its implications for  
476 aerial respiration in stem tetrapods. *Nat. Commun.* **5**, 3022.
- 477 **Hackford, A. W., Gillies, C. G., Eastwood, C. and Goldblatt, P. J.** (1977). Thyroxine-induced gill  
478 resorption in the axolotl (*Ambystoma mexicanum*). *J. Morphol.* **153**, 479–503.
- 479 **Hellman, N. E., Liu, Y., Merkel, E., Austin, C., Le Corre, S., Beier, D. R., Sun, Z., Sharma, N.,**  
480 **Yoder, B. K. and Drummond, I. A.** (2010). The zebrafish *foxj1a* transcription factor regulates  
481 cilia function in response to injury and epithelial stretch. *Proc. Natl. Acad. Sci. U. S. A.* **107**,  
482 18499–18504.
- 483 **Ichikawa, R. and Toyozumi, R.** (2020). Finely tuned ciliary alignment and coordinated beating  
484 generate continuous water flow across the external gills in *Pleurodeles waltl* larvae.  
485 *Zoomorphology* **139**, 247–262.
- 486 **Kemp, A.** (1996). Role of epidermal cilia in development of the Australian lungfish, *Neoceratodus*  
487 *forsteri* (Osteichthyes: Dipnoi). *J. Morphol.* **228**, 203–221.
- 488 **Lee, R. J., Xiong, G., Kofonow, J. M., Chen, B., Lysenko, A., Jiang, P., Abraham, V.,**  
489 **Doghramji, L., Adappa, N. D., Palmer, J. N., et al.** (2012). T2R38 taste receptor  
490 polymorphisms underlie susceptibility to upper respiratory infection. *J. Clin. Invest.* **122**, 4145–  
491 4159.
- 492 **Leguen, I.** (2018). Gills of the medaka (*Oryzias latipes*): A scanning electron microscopy study. *J.*  
493 *Morphol.* **279**, 97–108.

- 494 **Liao, Y., Smyth, G. K. and Shi, W.** (2014). featureCounts: an efficient general purpose program for  
495 assigning sequence reads to genomic features. *Bioinformatics* **30**, 923–930.
- 496 **Liao, Y., Wang, J., Jaehnig, E. J., Shi, Z. and Zhang, B.** (2019). WebGestalt 2019: gene set  
497 analysis toolkit with revamped UIs and APIs. *Nucleic Acids Res.* **47**, W199–W205.
- 498 **Low, W. P., Lane, D. J. W. and Ip, Y. K.** (1988). A Comparative Study of Terrestrial Adaptations of  
499 the Gills in Three Mudskippers: *Periophthalmus chrysospilos*, *Boleophthalmus boddarta*, and  
500 *Periophthalmodon schlosseri*. *Biol. Bull.* **175**, 434–438.
- 501 **Magid, A. M.** (1966). Breathing and function of the spiracles in *Polypterus senegalus*. *Anim. Behav.*  
502 **14**, 530–533.
- 503 **Maina, J. N.** (2018). Functional morphology of the respiratory organs of the air-breathing fish with  
504 particular emphasis on the African catfishes, *Clarias mossambicus* and *C. gariepinus*. *Acta*  
505 *Histochem.* **120**, 613–622.
- 506 **Messerli, M., Aaldijk, D., Habberthür, D., Röss, H., García-Poyatos, C., Sande-Melón, M.,**  
507 **Khoma, O.-Z., Wieland, F. A. M., Fark, S. and Djonov, V.** (2020). Adaptation mechanism of  
508 the adult zebrafish respiratory organ to endurance training. *PLoS One* **15**, e0228333.
- 509 **Milsom, W. K.** (1989). Mechanisms of ventilation in lower vertebrates: adaptations to respiratory and  
510 nonrespiratory constraints. *Can. J. Zool.* **67**, 2943–2955.
- 511 **Mukherjee, I., Roy, S. and Chakrabarti, S.** (2019). Identification of Important Effector Proteins in  
512 the FOXJ1 Transcriptional Network Associated With Ciliogenesis and Ciliary Function. *Front.*  
513 *Genet.* **10**, 23.
- 514 **Nilsson, G. E., Dymowska, A. and Stecyk, J. A. W.** (2012). New insights into the plasticity of gill  
515 structure. *Respir. Physiol. Neurobiol.* **184**, 214–222.
- 516 **Ong, K. J., Stevens, E. D. and Wright, P. A.** (2007). Gill morphology of the mangrove killifish  
517 (*Kryptolebias marmoratus*) is plastic and changes in response to terrestrial air exposure. *J. Exp.*  
518 *Biol.* **210**, 1109–1115.
- 519 **Rahn, H.** (1966). Aquatic gas exchange: theory. *Respir. Physiol.* **1**, 1–12.
- 520 **Sayer, M. D. J.** (2005). Adaptations of amphibious fish for surviving life out of water. *Fish Fish* **6**,  
521 186–211.
- 522 **Schoch, R. R. and Witzmann, F.** (2011). Bystrow's Paradox - gills, fossils, and the fish-to-tetrapod

- 523 transition. *Acta Zool.* **92**, 251–265.
- 524 **Shah, A. S., Ben-Shahar, Y., Moninger, T. O., Kline, J. N. and Welsh, M. J.** (2009). Motile cilia  
525 of human airway epithelia are chemosensory. *Science* **325**, 1131–1134.
- 526 **Shartau, R. B. and Brauner, C. J.** (2014). Acid-base and ion balance in fishes with bimodal  
527 respiration. *J. Fish Biol.* **84**, 682–704.
- 528 **Sollid, J., De Angelis, P., Gundersen, K. and Nilsson, G. E.** (2003). Hypoxia induces adaptive and  
529 reversible gross morphological changes in crucian carp gills. *J. Exp. Biol.* **206**, 3667–3673.
- 530 **Standen, E. M., Du, T. Y. and Larsson, H. C. E.** (2014). Developmental plasticity and the origin of  
531 tetrapods. *Nature* **513**, 54–58.
- 532 **Sun, J., Nishiyama, T., Shimizu, K. and Kadota, K.** (2013). TCC: an R package for comparing tag  
533 count data with robust normalization strategies. *BMC Bioinformatics* **14**, 219.
- 534 **Tatsumi, N., Kobayashi, R., Yano, T., Noda, M., Fujimura, K., Okada, N. and Okabe, M.** (2016).  
535 Molecular developmental mechanism in polypterid fish provides insight into the origin of  
536 vertebrate lungs. *Sci. Rep.* **6**, 30580.
- 537 **Turko, A. J., Cooper, C. A. and Wright, P. A.** (2012). Gill remodelling during terrestrial  
538 acclimation reduces aquatic respiratory function of the amphibious fish *Kryptolebias*  
539 *marmoratus*. *J. Exp. Biol.* **215**, 3973–3980.
- 540 **Turko, A. J., Maini, P., Wright, P. A. and Standen, E. M.** (2019). Gill remodelling during  
541 terrestrial acclimation in the amphibious fish *Polypterus senegalus*. *J. Morphol.* **280**, 329–338.
- 542 **Tuzim, K. and Korolczuk, A.** (2021). An update on extra-oral bitter taste receptors. *J. Transl. Med.*  
543 **19**, 440.
- 544 **Ultsch, G. R.** (1987). The potential role of hypercarbia in the transition from water-breathing to air-  
545 breathing in vertebrates. *Evolution* **41**, 442–445.
- 546 **Ultsch, G. R.** (1996). Gas exchange, hypercarbia and acid-base balance, paleoecology, and the  
547 evolutionary transition from water-breathing to air-breathing among vertebrates. *Palaeogeogr.*  
548 *Palaeoclimatol. Palaeoecol.* **123**, 1–27.
- 549 **Wang, K., Wang, J., Zhu, C., Yang, L., Ren, Y., Ruan, J., Fan, G., Hu, J., Xu, W., Bi, X., et al.**  
550 (2021). African lungfish genome sheds light on the vertebrate water-to-land transition. *Cell* **184**,  
551 1362–1376.e18.

- 552 **Wright, P. A. and Turko, A. J.** (2016). Amphibious fishes: evolution and phenotypic plasticity. *J.*  
553 *Exp. Biol.* **219**, 2245–2259.
- 554 **Yu, X., Ng, C. P., Habacher, H. and Roy, S.** (2008). Foxj1 transcription factors are master  
555 regulators of the motile ciliogenic program. *Nat. Genet.* **40**, 1445–1453.
